# Supplementary material for: Agarose Spot as a Comparative Method for in situ Analysis of Simultaneous Chemotactic Responses to Multiple Chemokines
Source: PubMed Central journal article supplement (PMC5430824; doi:10.1038/s41598-017-00949-4), 2017-04-21
Supplement: 41598_2017_949_MOESM5_ESM.pdf [file 41598_2017_949_MOESM5_ESM.pdf]

## Supplementary Information

### Agarose Spot as a Comparative Method for *in situ* Analysis of Simultaneous Chemotactic Responses to Multiple Chemokines

Mohaned Ahmed,<sup>1</sup> Haneen A. Basheer,<sup>1</sup> Jose M. Ayuso,<sup>2§</sup> Djevdet Ahmet,<sup>1</sup> Marco Mazzini,<sup>3</sup>  
Roshan Patel,<sup>1</sup> Steven D. Shnyder,<sup>1</sup> Victoria Vinader,<sup>1</sup> Kamyar Afarinkia<sup>1\*</sup>

<sup>1</sup> The Institute of Cancer Therapeutics, University of Bradford, West Yorkshire BD7 1DP, United Kingdom.

<sup>2</sup> Group of Structural Mechanics and Material Modelling, Universidad Zaragoza, Zaragoza, Spain.

<sup>3</sup> Dipartimento di Scienza e Tecnologia del Farmaco, Università Degli Studi di Torino, Via P. Giuria 9, 10125, Torino, Italy.

<sup>§</sup> Current address: Department of Biomedical Engineering, Wisconsin Institutes for Medical Research, and The University of Wisconsin Carbone Cancer Center Madison, University of Wisconsin-Madison, Madison, WI 53715, USA.

Correspondence should be addressed to ([k.afarinkia@bradford.ac.uk](mailto:k.afarinkia@bradford.ac.uk))

**Supplementary Information S1. (A)** Video showing movement of PC-3 cells under an agarose spot containing CCL21. **(B)** Video showing tracking of PC-3 cells movements adjacent to an agarose spot containing CCL21. **(C)** Video showing tracking of PC-3 cells movements under an agarose spot containing CCL21.

**Supplementary Information S2.** A video tutorial for agarose spot assay

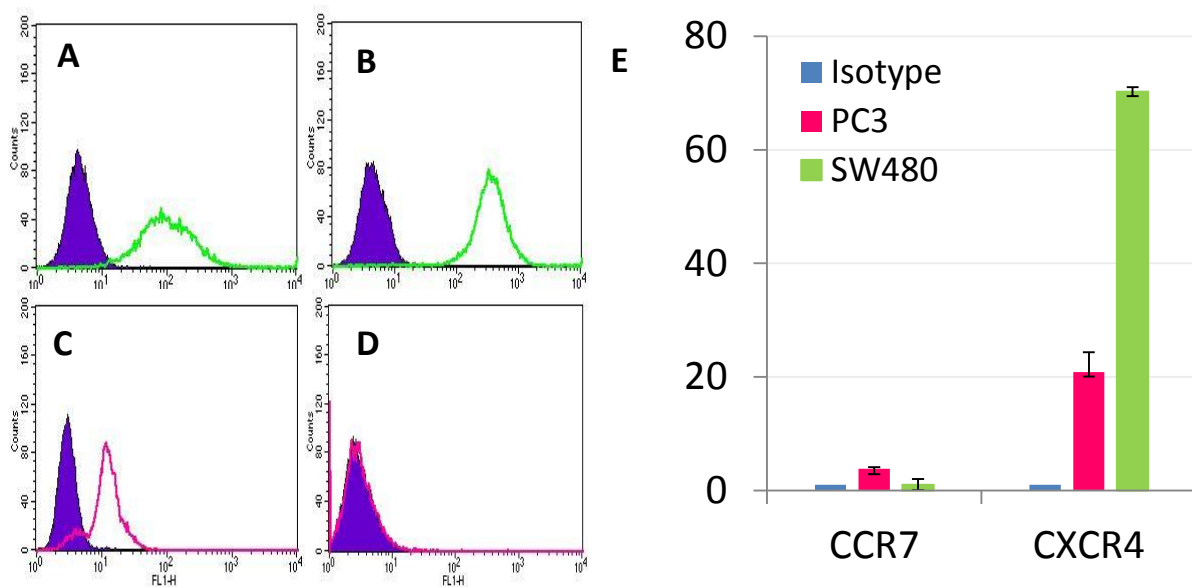

**Supplementary Information S3.** Expression of CXCR4 (green) compared with isotype (filled purple) in: (A) PC-3 cells; (B) SW480 cells; Expression CCR7 (cyan) compared with isotype (filled purple) in: (C) PC-3 cells; (D) SW480 cells; (E) Relative expression of CCR7 and CXCR4 relative to isotype control.

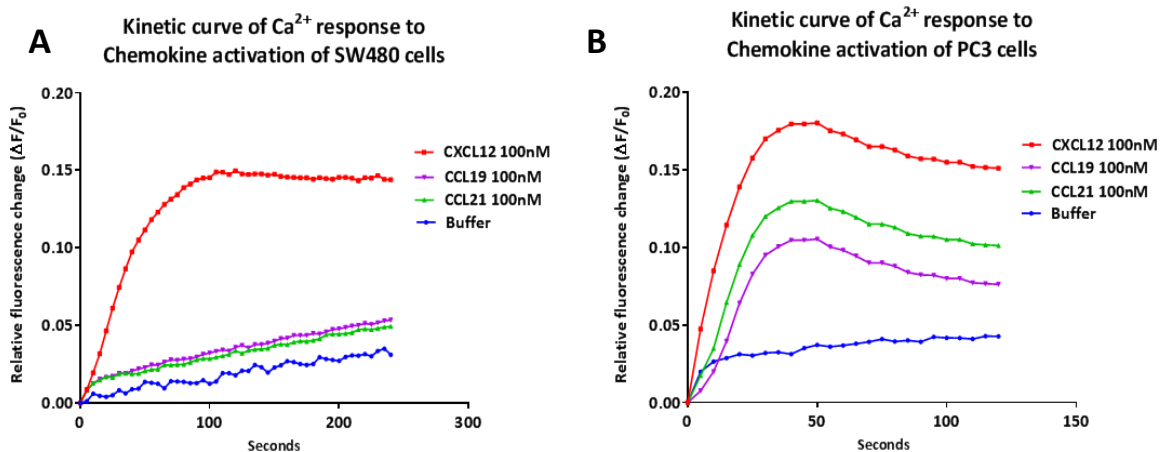

**Supplementary Information S4.** (A) Calcium mobilisation (Ca<sup>2+</sup> flux) assay shows SW480 cells respond to 100 nM CXCL12 (red), but not to CCL21 (green), and CCL19 (purple). (B) calcium mobilisation (Ca<sup>2+</sup> flux) assay shows PC-3 cells respond to 100 nM CXCL12 (red), CCL21 (green), and CCL19 (purple). Control (assay buffer, blue) shown for comparison.

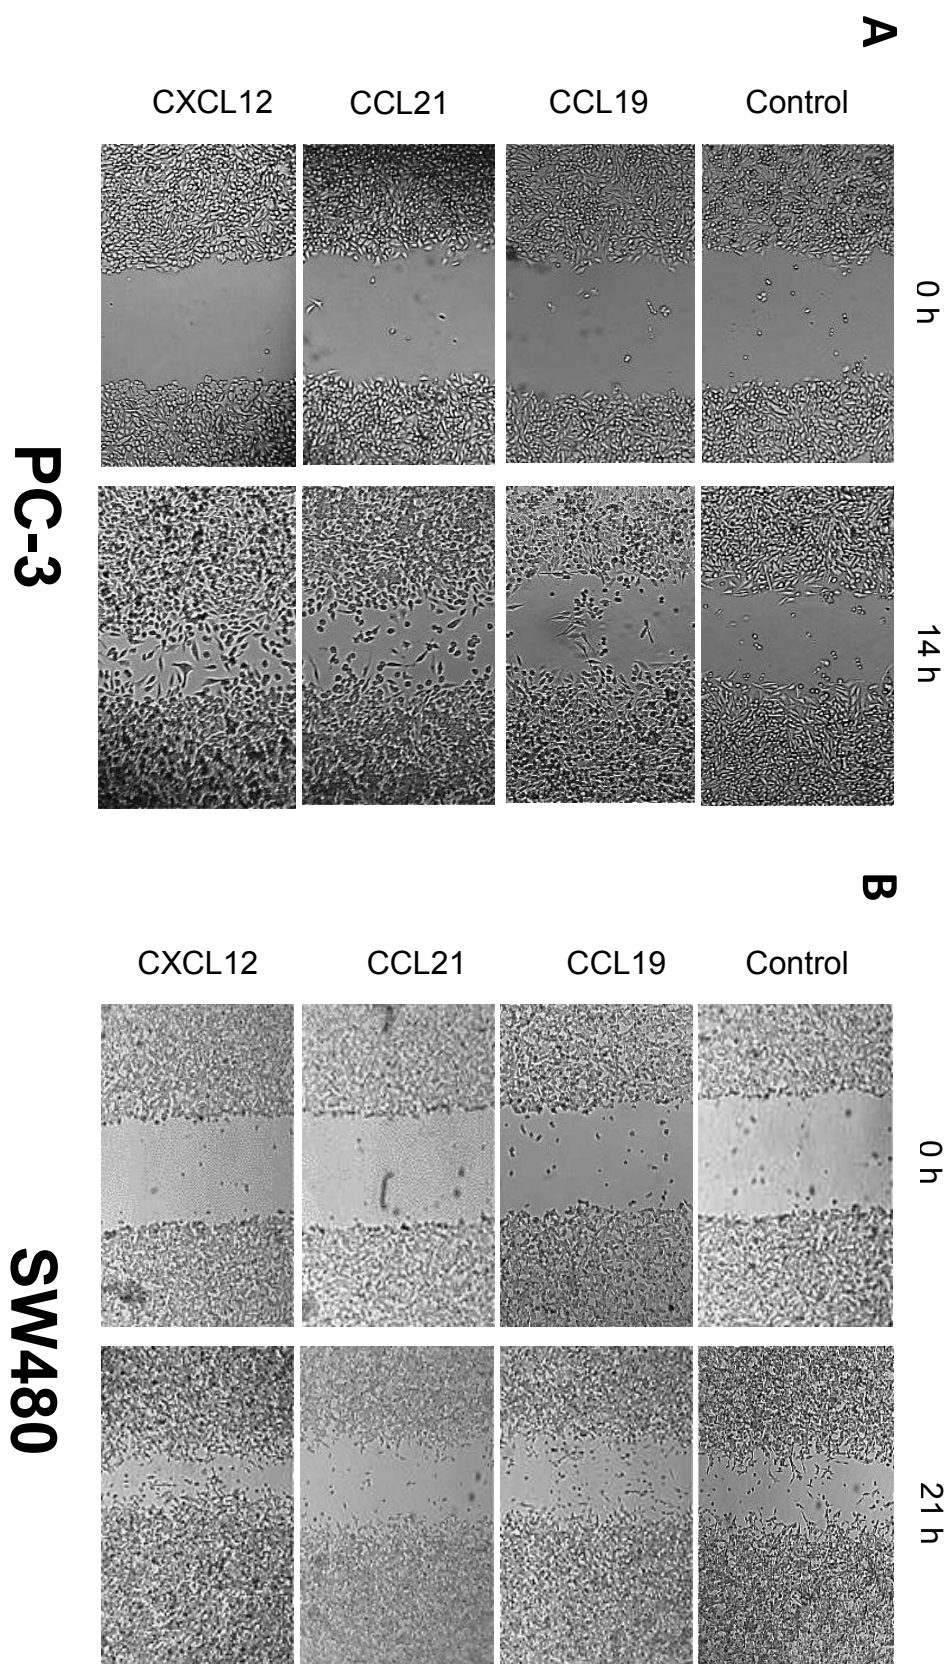

**Supplementary Information S5.** (A) Scratch assay showing the responses to CXCL12, CCL21, CCL19 (10nM) and control for PC-3 cells. (B) Scratch assay showing the responses to CXCL12, CCL21, CCL19 (10nM) and control for SW480 cells.
